# Supplementary material for: Interfacial engineering of self-assembled monolayer modified semi-roll-to-roll planar heterojunction perovskite solar cells on flexible substrates
Source: Royal Society of Chemistry journal article supplement (doi:10.1039/c5ta07008b), 2015-01-01
Supplement: c5ta07008b1.pdf [file c5ta07008b1.pdf]

## Supporting Information

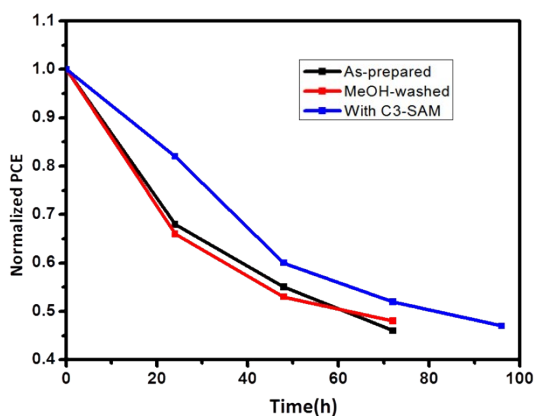

**Fig. S1** Normalized PCE values as a function of aging time of devices based on different PEDOT:PSS substrates. PCE values are averages of 8 devices. The devices were stored in darkness in air with controlled relative humidity of 25%.

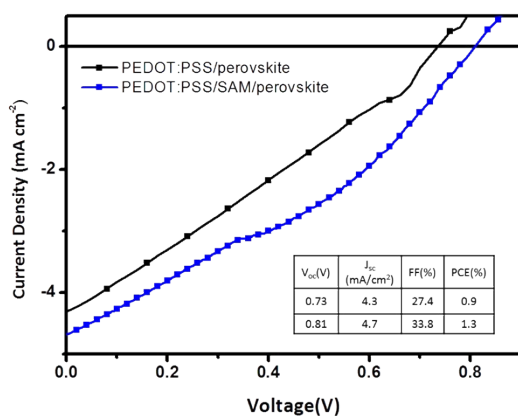

**Fig. S2** Best J-V curves of full roll-to-roll fabricated devices. Forward bias to short-circuit voltage sweep was conducted from -0.1 to 1.0 V with voltage steps of 5 mV. The Ag electrode was screen-printed.
